# Supplementary material for: UniVIO: A Multiple Omics Database with Hormonome and Transcriptome Data from Rice
Source: PubMed Central journal article supplement — Plant Cell Physiol. 2013 Jan 10;54(2):e9. doi: 10.1093/pcp/pct003 (PMC3583028; doi:10.1093/pcp/pct003), 2013-01-10
Supplement: supp_pct003_pcp-2012-e-00453-File009.pdf [file supp_pct003_pcp-2012-e-00453-File009.pdf]

| Probe ID                      | Symbol/discrption                         | Correlations |        |       |        |        |       |       |        |        |       |       |      |        |      |
|-------------------------------|-------------------------------------------|--------------|--------|-------|--------|--------|-------|-------|--------|--------|-------|-------|------|--------|------|
|                               |                                           | iPRPs        | cZRP   | iPR   | tZR    | cZR    | cZ    | cZRP  | cZROG  | cZOG   | IAA   | GA9   | GA19 | ABA    |      |
| <b>Abcisic acid signaling</b> |                                           |              |        |       |        |        |       |       |        |        |       |       |      |        |      |
| Os.55612.1.S1_at              | <i>OsPYL/RCAR4</i>                        | n.s.         | -0.677 | n.s.  | n.s.   | n.s.   | n.s.  | n.s.  | n.s.   | n.s.   | n.s.  | n.s.  | n.s. | n.s.   | n.s. |
| Os.46585.1.S1_at              | <i>OsPYL/RCAR10</i>                       | 0.849        | 0.721  | n.s.  | n.s.   | n.s.   | n.s.  | n.s.  | n.s.   | -0.746 | n.s.  | n.s.  | n.s. | n.s.   | n.s. |
| Os.5395.1.S1_at               | <i>OsPYL/RCAR5</i>                        | -0.792       | -0.849 | n.s.  | n.s.   | n.s.   | n.s.  | n.s.  | n.s.   | 0.697  | n.s.  | n.s.  | n.s. | n.s.   | n.s. |
| Os.52518.1.S1_at              | <i>OsPP2C53</i>                           | n.s.         | -0.693 | n.s.  | n.s.   | n.s.   | n.s.  | n.s.  | n.s.   | n.s.   | n.s.  | n.s.  | n.s. | n.s.   | n.s. |
| Os.18094.2.S1_a_at            | <i>OsPP2C50</i>                           | n.s.         | -0.741 | n.s.  | n.s.   | n.s.   | n.s.  | n.s.  | n.s.   | n.s.   | n.s.  | n.s.  | n.s. | n.s.   | n.s. |
| Os.27906.1.S1_a_at            | <i>OsPP2C09</i>                           | n.s.         | -0.676 | n.s.  | n.s.   | n.s.   | n.s.  | n.s.  | n.s.   | n.s.   | n.s.  | n.s.  | n.s. | -0.710 | n.s. |
| OsAffx.23594.1.S1_at          | <i>OsPP2C06</i>                           | n.s.         | n.s.   | n.s.  | n.s.   | 0.682  | n.s.  | 0.834 | 0.811  | n.s.   | n.s.  | n.s.  | n.s. | n.s.   | n.s. |
| OsAffx.27219.1.S1_at          | <i>OsPP2C49</i>                           | n.s.         | n.s.   | n.s.  | n.s.   | n.s.   | n.s.  | n.s.  | 0.670  | n.s.   | 0.970 | 0.690 | n.s. | n.s.   | n.s. |
| Os.12646.1.S1_at              | <i>SnRK2 family, subclass I</i>           | 0.891        | 0.779  | n.s.  | n.s.   | n.s.   | n.s.  | n.s.  | n.s.   | n.s.   | n.s.  | n.s.  | n.s. | n.s.   | n.s. |
| Os.10746.1.S1_a_at            | <i>SnRK3 family, subclass I</i>           | 0.740        | n.s.   | n.s.  | n.s.   | 0.688  | n.s.  | 0.854 | 0.762  | n.s.   | n.s.  | n.s.  | n.s. | n.s.   | n.s. |
| Os.3401.1.S1_at               | <i>SnRK2 family, subclass II</i>          | n.s.         | n.s.   | n.s.  | n.s.   | n.s.   | n.s.  | n.s.  | n.s.   | n.s.   | n.s.  | n.s.  | n.s. | 0.816  | n.s. |
| Os.12645.1.S1_at              | <i>SnRK2 family, subclass II</i>          | n.s.         | -0.667 | n.s.  | n.s.   | n.s.   | n.s.  | n.s.  | n.s.   | n.s.   | n.s.  | n.s.  | n.s. | n.s.   | n.s. |
| Os.10334.1.S1_at              | <i>SnRK2 family, subclass III</i>         | 0.802        | n.s.   | n.s.  | n.s.   | n.s.   | n.s.  | 0.716 | n.s.   | n.s.   | n.s.  | n.s.  | n.s. | n.s.   | n.s. |
| Os.54299.1.S1_at              | <i>ABF-like bZIP transcription factor</i> | 0.890        | 0.877  | n.s.  | n.s.   | n.s.   | n.s.  | n.s.  | n.s.   | n.s.   | n.s.  | n.s.  | n.s. | n.s.   | n.s. |
| Os.11781.1.S1_at              | <i>ABF-like bZIP transcription factor</i> | n.s.         | n.s.   | n.s.  | n.s.   | -0.685 | n.s.  | n.s.  | n.s.   | n.s.   | n.s.  | n.s.  | n.s. | n.s.   | n.s. |
| Os.15711.1.S1_at              | <i>ABF-like bZIP transcription factor</i> | n.s.         | -0.725 | n.s.  | n.s.   | n.s.   | n.s.  | n.s.  | n.s.   | n.s.   | n.s.  | n.s.  | n.s. | n.s.   | n.s. |
| Os.42200.1.S1_at              | <i>ABF-like bZIP transcription factor</i> | n.s.         | n.s.   | 0.732 | n.s.   | n.s.   | 0.757 | n.s.  | n.s.   | n.s.   | n.s.  | n.s.  | n.s. | n.s.   | n.s. |
| Os.411.1.S1_a_at              | <i>ABF-like bZIP transcription factor</i> | n.s.         | n.s.   | n.s.  | n.s.   | 0.682  | n.s.  | 0.746 | 0.783  | n.s.   | n.s.  | n.s.  | n.s. | n.s.   | n.s. |
| Os.37925.1.S1_a_at            | <i>ABF-like bZIP transcription factor</i> | 0.837        | 0.792  | 0.757 | n.s.   | n.s.   | 0.672 | 0.779 | n.s.   | n.s.   | n.s.  | n.s.  | n.s. | n.s.   | n.s. |
| Os.49497.1.S1_at              | <i>ABF-like bZIP transcription factor</i> | 0.752        | 0.849  | n.s.  | 0.717  | n.s.   | n.s.  | n.s.  | n.s.   | n.s.   | n.s.  | n.s.  | n.s. | 0.864  | n.s. |
| <b>Auxin signaling</b>        |                                           |              |        |       |        |        |       |       |        |        |       |       |      |        |      |
| Os.10149.1.S1_x_at            | <i>OsAFB2</i>                             | n.s.         | n.s.   | 0.686 | n.s.   | 0.723  | n.s.  | 0.911 | 0.738  | n.s.   | n.s.  | n.s.  | n.s. | n.s.   | n.s. |
| Os.10149.2.S1_at              | <i>OsAFB2</i>                             | n.s.         | n.s.   | 0.787 | n.s.   | 0.773  | 0.721 | 0.918 | 0.762  | n.s.   | n.s.  | n.s.  | n.s. | n.s.   | n.s. |
| Os.22269.1.S1_at              | <i>OsARF1</i>                             | n.s.         | n.s.   | n.s.  | n.s.   | n.s.   | n.s.  | 0.926 | 0.712  | n.s.   | n.s.  | n.s.  | n.s. | n.s.   | n.s. |
| Os.22269.2.S1_x_at            | <i>OsARF1</i>                             | n.s.         | n.s.   | n.s.  | n.s.   | 0.705  | n.s.  | 0.923 | 0.788  | n.s.   | n.s.  | n.s.  | n.s. | n.s.   | n.s. |
| Os.6367.1.S1_at               | <i>OsARF2</i>                             | 0.663        | n.s.   | n.s.  | n.s.   | n.s.   | n.s.  | n.s.  | n.s.   | n.s.   | n.s.  | n.s.  | n.s. | n.s.   | n.s. |
| Os.6367.2.S1_x_at             | <i>OsARF2</i>                             | 0.708        | n.s.   | n.s.  | n.s.   | n.s.   | n.s.  | n.s.  | n.s.   | n.s.   | n.s.  | n.s.  | n.s. | n.s.   | n.s. |
| Os.34249.1.S1_at              | <i>OsARF3</i>                             | n.s.         | n.s.   | n.s.  | n.s.   | n.s.   | n.s.  | n.s.  | n.s.   | n.s.   | n.s.  | n.s.  | n.s. | 0.712  | n.s. |
| Os.34249.2.S1_at              | <i>OsARF3</i>                             | n.s.         | n.s.   | n.s.  | n.s.   | n.s.   | n.s.  | n.s.  | n.s.   | n.s.   | n.s.  | n.s.  | n.s. | 0.670  | n.s. |
| Os.34249.2.S1_x_at            | <i>OsARF3</i>                             | n.s.         | n.s.   | n.s.  | n.s.   | n.s.   | n.s.  | n.s.  | n.s.   | n.s.   | n.s.  | n.s.  | n.s. | 0.686  | n.s. |
| Os.11696.1.S1_a_at            | <i>OsARF4</i>                             | -0.786       | -0.826 | n.s.  | n.s.   | n.s.   | n.s.  | n.s.  | n.s.   | 0.711  | n.s.  | n.s.  | n.s. | n.s.   | n.s. |
| Os.11696.1.S1_at              | <i>OsARF4</i>                             | -0.757       | -0.807 | n.s.  | n.s.   | n.s.   | n.s.  | n.s.  | n.s.   | 0.726  | n.s.  | n.s.  | n.s. | n.s.   | n.s. |
| Os.11696.2.S1_x_at            | <i>OsARF4</i>                             | -0.689       | -0.725 | n.s.  | n.s.   | n.s.   | n.s.  | n.s.  | n.s.   | 0.721  | n.s.  | n.s.  | n.s. | n.s.   | n.s. |
| Os.25597.1.S1_at              | <i>OsARF6</i>                             | n.s.         | n.s.   | 0.709 | n.s.   | 0.761  | 0.684 | 0.882 | 0.755  | n.s.   | n.s.  | n.s.  | n.s. | n.s.   | n.s. |
| Os.21860.1.S1_at              | <i>OsARF7</i>                             | 0.828        | 0.724  | n.s.  | n.s.   | n.s.   | n.s.  | n.s.  | n.s.   | n.s.   | n.s.  | n.s.  | n.s. | n.s.   | n.s. |
| Os.7177.2.S1_a_at             | <i>OsARF12</i>                            | 0.714        | 0.662  | 0.845 | 0.714  | 0.802  | 0.762 | 0.908 | 0.822  | n.s.   | n.s.  | n.s.  | n.s. | n.s.   | n.s. |
| Os.50772.1.S1_at              | <i>OsARF14</i>                            | 0.899        | 0.847  | n.s.  | n.s.   | n.s.   | n.s.  | n.s.  | n.s.   | n.s.   | n.s.  | n.s.  | n.s. | n.s.   | n.s. |
| Os.11036.1.S1_at              | <i>OsARF15</i>                            | n.s.         | n.s.   | 0.742 | n.s.   | n.s.   | n.s.  | n.s.  | n.s.   | n.s.   | n.s.  | n.s.  | n.s. | 0.709  | n.s. |
| Os.22750.1.S1_at              | <i>OsARF17</i>                            | 0.697        | n.s.   | 0.938 | 0.685  | 0.713  | 0.818 | 0.845 | 0.675  | n.s.   | n.s.  | n.s.  | n.s. | 0.901  | n.s. |
| Os.22735.1.S1_at              | <i>OsARF18</i>                            | 0.841        | n.s.   | n.s.  | n.s.   | n.s.   | n.s.  | n.s.  | n.s.   | n.s.   | n.s.  | n.s.  | n.s. | n.s.   | n.s. |
| Os.10817.3.S1_x_at            | <i>OsARF23</i>                            | n.s.         | n.s.   | n.s.  | n.s.   | n.s.   | n.s.  | n.s.  | n.s.   | 0.690  | n.s.  | n.s.  | n.s. | n.s.   | n.s. |
| Os.18308.1.S1_at              | <i>OsARF24</i>                            | n.s.         | n.s.   | n.s.  | n.s.   | n.s.   | n.s.  | 0.748 | n.s.   | n.s.   | n.s.  | n.s.  | n.s. | n.s.   | n.s. |
| Os.22272.1.S1_at              | <i>OsARF25</i>                            | 0.696        | n.s.   | 0.804 | 0.666  | 0.787  | 0.705 | 0.949 | 0.813  | n.s.   | n.s.  | n.s.  | n.s. | n.s.   | n.s. |
| Os.19952.1.S1_at              | <i>OsIAA2</i>                             | n.s.         | n.s.   | 0.883 | n.s.   | n.s.   | 0.806 | 0.846 | n.s.   | n.s.   | n.s.  | n.s.  | n.s. | n.s.   | n.s. |
| Os.12733.3.S1_x_at            | <i>OsIAA3</i>                             | n.s.         | 0.689  | n.s.  | 0.736  | 0.826  | 0.732 | 0.815 | 0.824  | n.s.   | n.s.  | n.s.  | n.s. | n.s.   | n.s. |
| Os.8585.1.S1_at               | <i>OsIAA13</i>                            | 0.886        | 0.947  | n.s.  | 0.669  | n.s.   | n.s.  | n.s.  | n.s.   | n.s.   | n.s.  | n.s.  | n.s. | 0.768  | n.s. |
| Os.4822.1.S1_at               | <i>OsIAA15</i>                            | 0.686        | 0.732  | n.s.  | n.s.   | n.s.   | n.s.  | n.s.  | n.s.   | n.s.   | n.s.  | n.s.  | n.s. | 0.762  | n.s. |
| Os.11876.1.S1_s_at            | <i>OsIAA17</i>                            | 0.787        | 0.795  | 0.696 | n.s.   | n.s.   | n.s.  | n.s.  | n.s.   | n.s.   | n.s.  | n.s.  | n.s. | 0.711  | n.s. |
| Os.8928.1.S1_at               | <i>OsIAA19</i>                            | n.s.         | n.s.   | n.s.  | n.s.   | n.s.   | n.s.  | n.s.  | n.s.   | n.s.   | 0.700 | n.s.  | n.s. | n.s.   | n.s. |
| Os.7687.1.S1_at               | <i>OsIAA21</i>                            | 0.954        | 0.841  | n.s.  | n.s.   | n.s.   | n.s.  | n.s.  | n.s.   | n.s.   | n.s.  | n.s.  | n.s. | n.s.   | n.s. |
| OsAffx.15562.1.S1_s_at        | <i>OsIAA21</i>                            | 0.964        | 0.777  | n.s.  | n.s.   | n.s.   | n.s.  | n.s.  | n.s.   | n.s.   | n.s.  | n.s.  | n.s. | n.s.   | n.s. |
| <b>Cytokinin signaling</b>    |                                           |              |        |       |        |        |       |       |        |        |       |       |      |        |      |
| Os.16444.1.S1_at              | <i>Ahp1</i>                               | 0.722        | 0.683  | 0.927 | 0.694  | 0.713  | 0.800 | 0.849 | 0.676  | n.s.   | n.s.  | n.s.  | n.s. | n.s.   | n.s. |
| Os.16444.1.S1_s_at            | <i>Ahp1</i>                               | n.s.         | n.s.   | 0.924 | n.s.   | n.s.   | 0.850 | 0.795 | n.s.   | n.s.   | n.s.  | n.s.  | n.s. | n.s.   | n.s. |
| Os.8117.1.S1_at               | <i>OsRR1</i>                              | 0.702        | n.s.   | n.s.  | n.s.   | n.s.   | 0.694 | n.s.  | n.s.   | n.s.   | n.s.  | n.s.  | n.s. | n.s.   | n.s. |
| Os.23942.1.A1_at              | <i>OsRR2</i>                              | n.s.         | n.s.   | 0.709 | n.s.   | n.s.   | n.s.  | n.s.  | n.s.   | n.s.   | n.s.  | n.s.  | n.s. | n.s.   | n.s. |
| Os.24952.1.S1_at              | <i>OsRR6</i>                              | n.s.         | n.s.   | 0.760 | n.s.   | 0.670  | 0.794 | n.s.  | 0.732  | n.s.   | n.s.  | n.s.  | n.s. | n.s.   | n.s. |
| Os.11949.1.S1_at              | <i>OsRR21</i>                             | -0.750       | -0.824 | n.s.  | -0.768 | -0.714 | n.s.  | n.s.  | -0.732 | n.s.   | n.s.  | n.s.  | n.s. | n.s.   | n.s. |
| Os.19406.1.S1_at              | <i>OsRR22</i>                             | 0.664        | n.s.   | n.s.  | n.s.   | n.s.   | n.s.  | n.s.  | n.s.   | n.s.   | n.s.  | n.s.  | n.s. | n.s.   | n.s. |
| Os.27847.1.S1_at              | <i>OsRR24</i>                             | n.s.         | -0.701 | n.s.  | n.s.   | n.s.   | n.s.  | n.s.  | n.s.   | n.s.   | n.s.  | n.s.  | n.s. | n.s.   | n.s. |
| Os.49428.1.S1_at              | <i>OsRR26</i>                             | n.s.         | n.s.   | 0.800 | n.s.   | n.s.   | 0.734 | 0.816 | n.s.   | n.s.   | n.s.  | n.s.  | n.s. | n.s.   | n.s. |
| <b>Gibberellin signaling</b>  |                                           |              |        |       |        |        |       |       |        |        |       |       |      |        |      |
| Os.3440.1.S2_at               | <i>GID2</i>                               | 0.800        | n.s.   | n.s.  | n.s.   | n.s.   | n.s.  | n.s.  | n.s.   | -0.804 | n.s.  | n.s.  | n.s. | n.s.   | n.s. |
| Os.4494.1.S1_at               | <i>SLR1</i>                               | 0.819        | 0.805  | n.s.  | n.s.   | n.s.   | n.s.  | n.s.  | n.s.   | n.s.   | n.s.  | n.s.  | n.s. | n.s.   | n.s. |

**Figure S1.** Correlations between hormone-related compounds and hormone-signaling genes. Plant hormone-related compounds detected in all organs tested are selected. Microarray probes representing 'Present' as flag information in all samples tested are selected. Pearson product-moment correlation coefficients are indicated and highlighted in red (positive) or blue (negative) where they are significant ( $\alpha=0.01$ ). n.s., not significant.

**A**

| ID                                   | Desc.                                                                                                                                                                                                                                                                                       | Flw     | PBr    | InN I-top | InN I-bsl | Nod I  | Nod II | FLB-tip | FLB-mid | FLB-bsl | FLS-top | FLS-bsl | FLB    | LB-2   | LB-4   |
|--------------------------------------|---------------------------------------------------------------------------------------------------------------------------------------------------------------------------------------------------------------------------------------------------------------------------------------------|---------|--------|-----------|-----------|--------|--------|---------|---------|---------|---------|---------|--------|--------|--------|
| <b>IAA</b>                           | Indole-3-acetic acid                                                                                                                                                                                                                                                                        | 1675.00 | 161.71 | 277.64    | 127.49    | 178.72 | 173.91 | 38.79   | 37.47   | 52.38   | 59.97   | 57.71   | 23.96  | 23.93  | 24.54  |
| <a href="#">Os.13941.1.S1_s_at</a>   | <a href="#">LOC_Os05g07720</a> - alliin lyase precursor, putative, expressed<br><a href="#">Os05g0169300</a> - Pyridoxal phosphate-dependent transferase, major region, subdomain 1 domain containing protein. (Os0510169300-01). Similar to Tryptophan aminotransferase. (Os0510169300-02) | 856.8   | 30.4   | 26.0      | 29.8      | 20.3   | 45.1   | 9.5     | 31.3    | 33.0    | 11.4    | 25.8    | 26.1   | 13.7   | 27.4   |
| <a href="#">Os.13941.1.S1_x_at</a>   |                                                                                                                                                                                                                                                                                             | 148.6   | 10.4   | 5.3       | 3.5       | 2.1    | 19.7   | 11.6    | 12.4    | 7.8     | 9.6     | 9.7     | 24.0   | 3.5    | 3.1    |
| <a href="#">Os.22585.1.S1_at</a>     | <a href="#">LOC_Os01g12490</a> - flavin monooxygenase, putative, expressed<br><a href="#">Os01g0224700</a> - YUCCA-like gene 4, Flavin monooxygenase-like enzyme, Auxin biosynthesis. (Os0110224700-01)                                                                                     | 5292.9  | 5.2    | 24.7      | 30.3      | 33.0   | 27.5   | 241.1   | 91.2    | 163.0   | 10.9    | 13.6    | 131.7  | 279.7  | 424.9  |
| <a href="#">Os.4176.1.S1_at</a>      | <a href="#">LOC_Os03g061120</a> - anthranilate synthase component I-1, chloroplast precursor, putative, expressed<br><a href="#">Os03g0826500</a> - Anthranilate synthase alpha 1 subunit. (Os0310826500-01)                                                                                | 370.5   | 298.8  | 204.5     | 118.9     | 256.4  | 336.2  | 157.0   | 115.3   | 113.0   | 117.1   | 231.3   | 94.7   | 108.9  | 136.7  |
| <a href="#">Os.6876.1.S1_at</a>      | <a href="#">LOC_Os04g38950</a> - class I glutamine amidotransferase, putative, expressed<br><a href="#">Os04g0463500</a> - Similar to Anthranilate synthase beta chain. (Os0410463500-01)                                                                                                   | 3539.1  | 2918.0 | 1198.3    | 313.0     | 1022.4 | 1518.1 | 2942.0  | 1911.9  | 2603.8  | 1240.3  | 613.5   | 2874.6 | 1272.0 | 3173.3 |
| <a href="#">OsAffx.31989.1.S1_at</a> |                                                                                                                                                                                                                                                                                             | 227.7   | 195.0  | 7.5       | 6.1       | 6.6    | 5.0    | 19.6    | 5.1     | 7.4     | 7.5     | 4.8     | 65.2   | 5.5    | 8.7    |

**B**

| ID                               | Desc.                                                                                                                                                                                                                                                                          | Flw    | PBr   | InN I-top | InN I-bsl | Nod I | Nod II | FLB-tip | FLB-mid | FLB-bsl | FLS-top | FLS-bsl | FLB   | LB-2  | LB-4   |
|----------------------------------|--------------------------------------------------------------------------------------------------------------------------------------------------------------------------------------------------------------------------------------------------------------------------------|--------|-------|-----------|-----------|-------|--------|---------|---------|---------|---------|---------|-------|-------|--------|
| <b>IAAsp</b>                     | Indole-3-acetyl-L-aspartic acid                                                                                                                                                                                                                                                | 979.50 |       |           |           |       |        |         |         |         |         |         |       |       |        |
| <b>IATrp</b>                     | Indole-3-acetyl-L-tryptophan                                                                                                                                                                                                                                                   | 11.21  |       |           |           |       |        |         |         |         |         |         |       |       |        |
| <a href="#">Os.11798.1.S1_at</a> | <a href="#">LOC_Os07g02900</a> - OsGH3.8 - Probable indole-3-acetic acid-amido synthetase, expressed<br><a href="#">Os07g0592600</a> - Similar to Indole-3-acetic acid-amido synthetase GH3.3 (EC 6.3.2.-) (Auxin- responsive GH3-like protein 3) (AtGH3-3). (Os0710592600-01) | 5503.3 | 163.3 | 20.9      | 194.2     | 90.7  | 224.7  | 429.0   | 73.2    | 103.2   | 103.1   | 92.3    | 227.7 | 102.7 | 1192.8 |

**Figure S2.** Heat map tables of IAA and IAA-biosynthetic genes (A) and IAAsp, IATrp, and the IAA-amino acid synthase family gene *OsGH3-8* (B). Heat map coloring is based on fold-change.
